# Supplementary material
Source: PubMed Central journal article supplement (PMC3378915)

# Supplemental Figure 1, Degen et al.

## N/TERT1

## SCC-13

### preconfluent

### confluent

### confluent

control

BfA

BfA+0.5h CHX

BfA+1h CHX

BfA+3h CHX

BfA+6h CHX

control

BfA

BfA+0.5h CHX

BfA+1h CHX

BfA+3h CHX

BfA+6h CHX

control

BfA

BfA+0.5h CHX

BfA+1h CHX

BfA+3h CHX

BfA+6h CHX

Lamy2

c-myc

actin

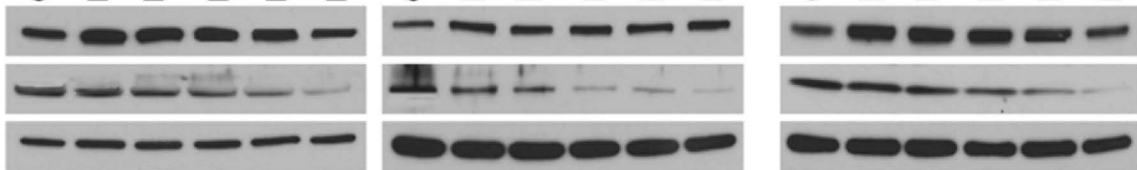

Supplement: mmc1.pdf [file mmc1.pdf]
