# Supplementary material
Source: PubMed Central journal article supplement (PMC3378915)

# Supplemental Figure 3, Degen et al.

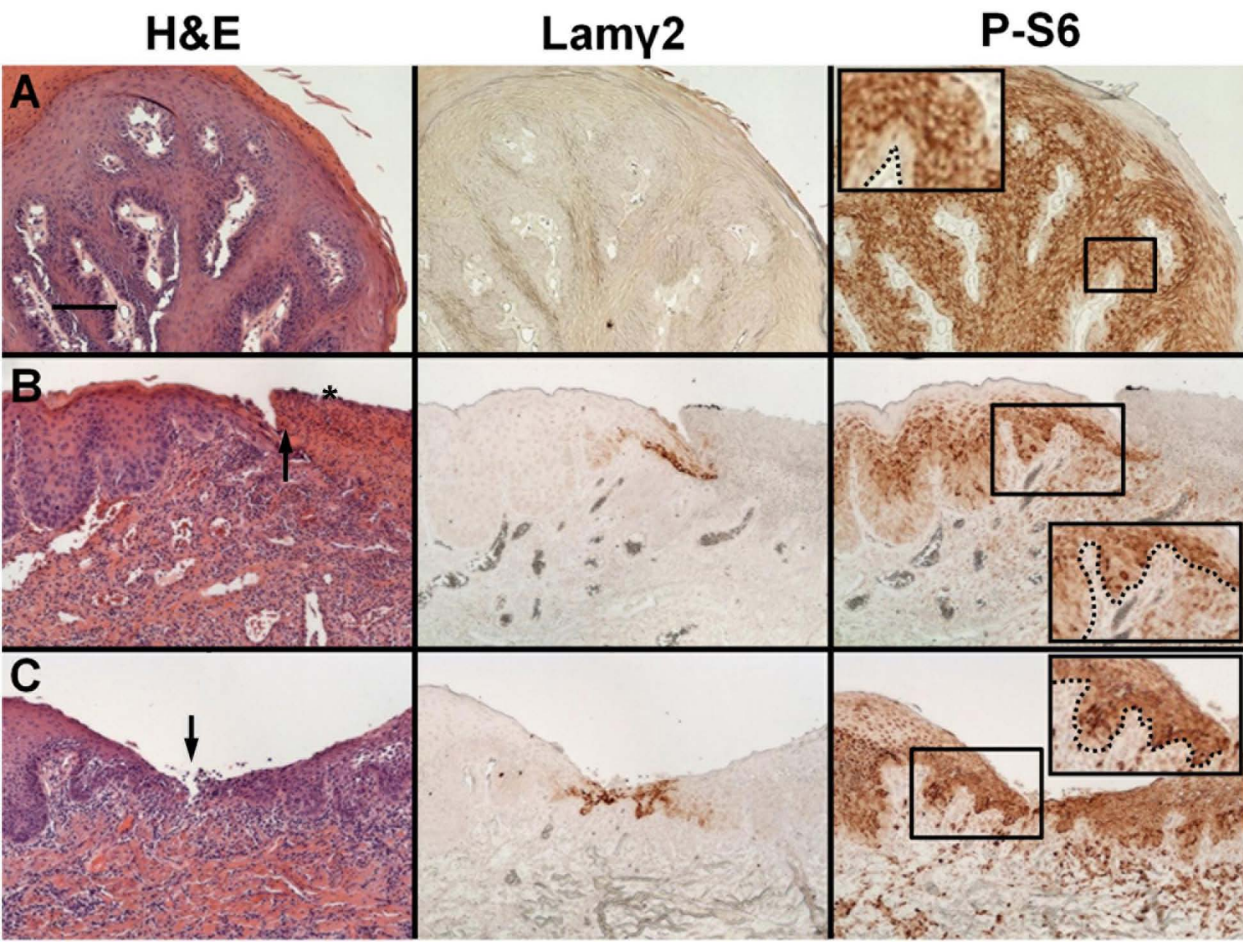

Supplement: mmc3.pdf [file mmc3.pdf]

# Supplemental Figure 4, Degen et al.

## A

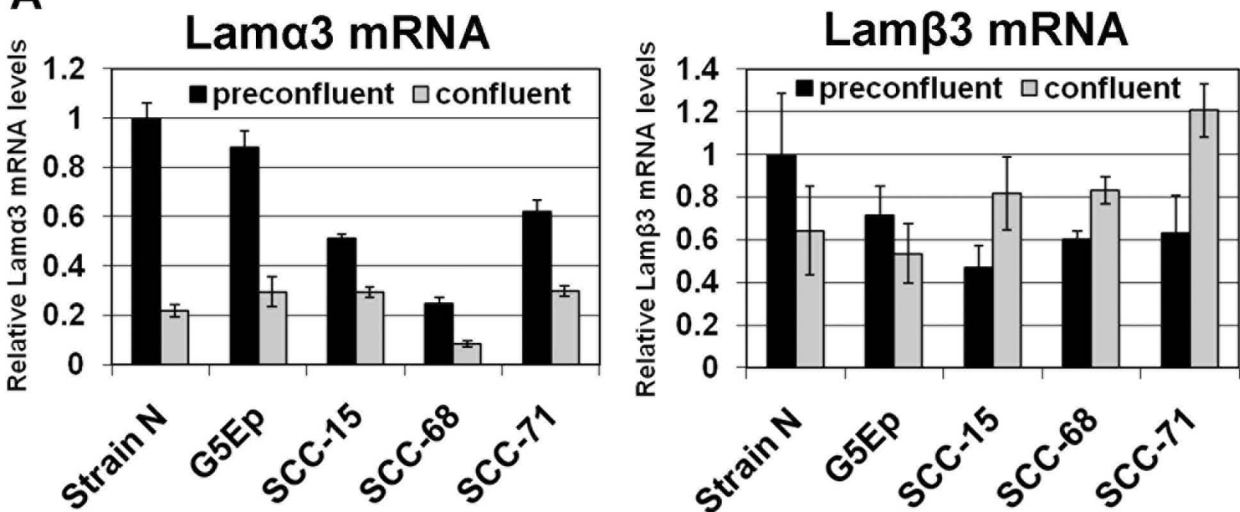

## B

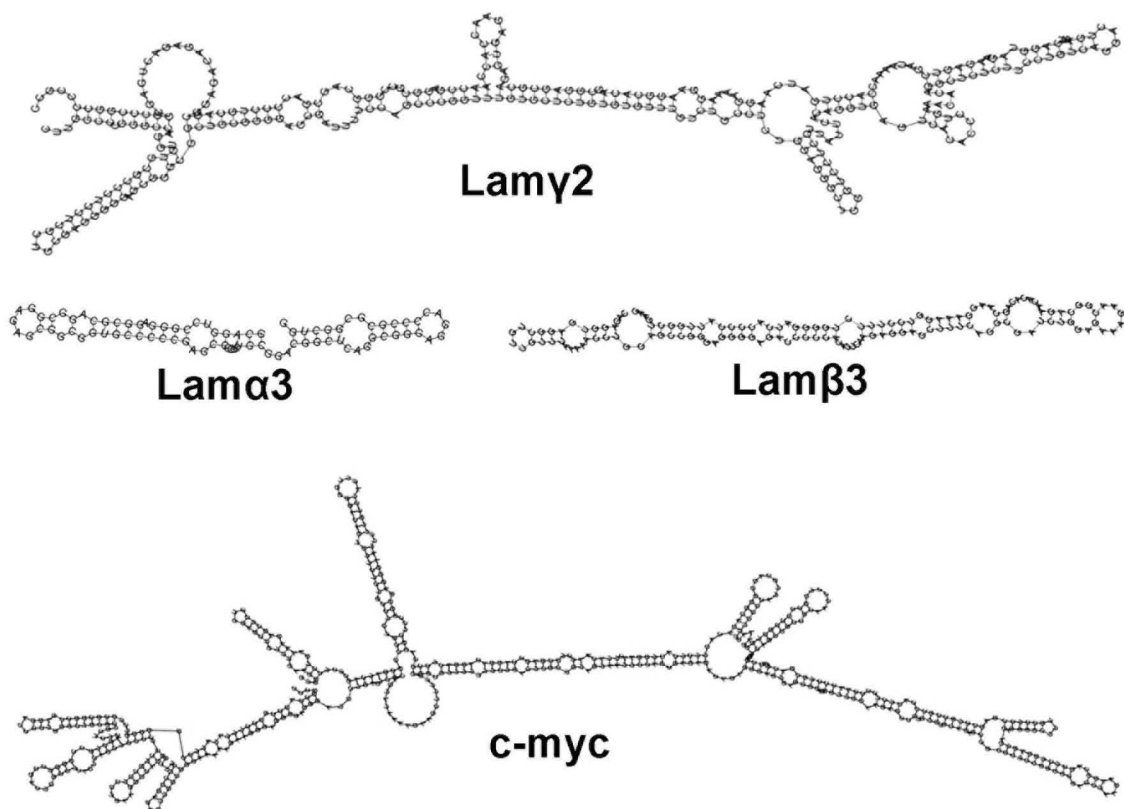

Supplement: mmc4.pdf [file mmc4.pdf]

# Supplemental Figure 5, Degen et al.

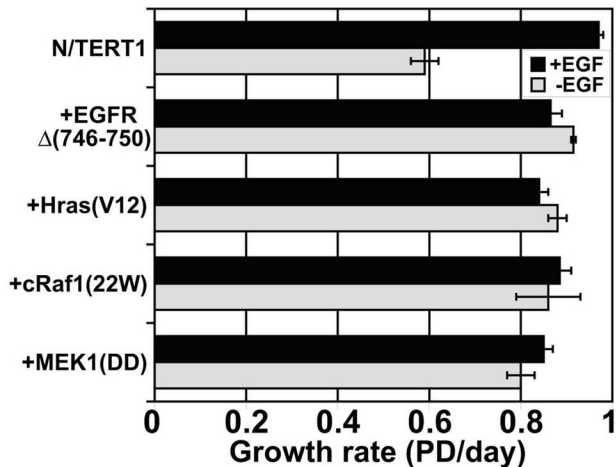

Supplement: mmc5.pdf [file mmc5.pdf]
